# Supplementary material for: Analysis of Sequence Variability and Transcriptional Profile of Cannabinoid synthase Genes in Cannabis sativa L. Chemotypes with a Focus on Cannabichromenic acid synthase
Source: Plants (Basel). 2021 Sep 8;10(9):1857. doi: 10.3390/plants10091857 (PMC8466818; doi:10.3390/plants10091857)
Supplement: Supplementary file 1 [file plants-10-01857-s001.zip › Supplementary File 1.pdf]

Supplementary File 1

# Analysis of sequence variability and transcriptional profile of *cannabinoid synthase* genes in *Cannabis sativa* L. chemotypes with a focus on *cannabichromenic acid synthase*

**Flavia Fulvio<sup>1,2</sup>, Roberta Paris<sup>1\*</sup>, Massimo Montanari<sup>1</sup>, Cinzia Citti<sup>3,4</sup>, Vincenzo Cilento<sup>1</sup>, Laura Bassolino<sup>1</sup>, Anna Moschella<sup>1</sup>, Ilaria Alberti<sup>5</sup>, Nicola Pecchioni<sup>6</sup>, Giuseppe Cannazza<sup>3,4</sup> and Giuseppe Mandolino<sup>1</sup>**

1 CREA-Research Center for Cereal and Industrial Crops, Via di Corticella 133, 40128 Bologna, Italy

2 Department of Sciences of Agriculture, Food Natural resources and Engineering, University of Foggia, Via Napoli 25, 71122 Foggia, Italy

3 CNR NANOTEC – Institute of Nanotechnology, Via Monteroni, 73100, Lecce, Italy

4 Department of Life Science, University of Modena and Reggio Emilia, Via G. Campi 103, 41125, Modena, Italy

5 CREA-Research Center for Cereal and Industrial Crops, Via G. Amendola 82, 45100 Rovigo, Italy

6 CREA-Research Center for Cereal and Industrial Crops, S.S. 673 Km 25,200, 71122, Foggia, Italy

\* Correspondence: roberta.paris@crea.gov.it

Supplementary File S1: nucleotide sequence alignment of *CBCAS* genes downloaded from sequenced genomes, AB212830 and a *CBCAS* sequenced from one of the genotypes under study.

CLUSTAL multiple sequence alignment by MUSCLE (3.8)

```
AB212830.1
NC_044378.1:25821957-25823591
QKVJ02004887.1:13943-15577
MNPR01002882.1:12890-14524
MXBD01006695.1:30197-31831
AGQN03005496.1:2986-4620
QVPT02000161.1:1531540-1533174
MW429551

ATGAATTGCTCACTTCCTTTTGGTTTGTTCGAAAATAATATTTTCTTTCTCTCA
ATGAATTGCTCAACATTCTCCTTTTGGTTTGTTCGAAAATAATATTTTCTTTCTCTCA
ATGAATTGCTCAACATTCTCCTTTTGGTTTGTTCGAAAATAATATTTTCTTTCTCTCA
ATGAATTGCTCAACATTCTCCTTTTGGTTTGTTCGAAAATAATATTTTCTTTCTCTCA
ATGAATTGCTCAACATTCTCCTTTTGGTTTGTTCGAAAATAATATTTTCTTTCTCTCA
ATGAATTGCTCAACATTCTCCTTTTGGTTTGTTCGAAAATAATATTTTCTTTCTCTCA
ATGAATTGCTCAACATTCTCCTTTTGGTTTGTTCGAAAATAATATTTTCTTTCTCTCA
*****

AB212830.1
NC_044378.1:25821957-25823591
QKVJ02004887.1:13943-15577
MNPR01002882.1:12890-14524
MXBD01006695.1:30197-31831
AGQN03005496.1:2986-4620
QVPT02000161.1:1531540-1533174
MW429551

TTCAATATCCAAATTTCAATAGCTAATCCTCAAGAAAACCTTCCTTAAATGCTTCTCGGAA
TTCAATATCCAAATTTCAATAGCTAATCCTCAAGAAAACCTTCCTTAAATGCTTCTCGGAA
TTCAATATCCAAATTTCAATAGCTAATCCTCAAGAAAACCTTCCTTAAATGCTTCTCGGAA
TTCAATATCCAAATTTCAATAGCTAATCCTCAAGAAAACCTTCCTTAAATGCTTCTCGGAA
TTCAATATCCAAATTTCAATAGCTAATCCTCAAGAAAACCTTCCTTAAATGCTTCTCGGAA
TTCAATATCCAAATTTCAATAGCTAATCCTCAAGAAAACCTTCCTTAAATGCTTCTCGGAA
TTCAATATCCAAATTTCAATAGCTAATCCTCAAGAAAACCTTCCTTAAATGCTTCTCGGAA
*****

AB212830.1
NC_044378.1:25821957-25823591
QKVJ02004887.1:13943-15577
MNPR01002882.1:12890-14524
MXBD01006695.1:30197-31831
AGQN03005496.1:2986-4620
QVPT02000161.1:1531540-1533174
MW429551

TATATTCCTAACAATCCAGCAAATCCAAAATTCATATACACTCAACACGACCAATTGTAT
TATATTCCTAACAATCCAGCAAATCCAAAATTCATATACACTCAACACGACCAATTGTAT
TATATTCCTAACAATCCAGCAAATCCAAAATTCATATACACTCAACACGACCAATTGTAT
TATATTCCTAACAATCCAGCAAATCCAAAATTCATATACACTCAACACGACCAATTGTAT
TATATTCCTAACAATCCAGCAAATCCAAAATTCATATACACTCAACACGACCAATTGTAT
TATATTCCTAACAATCCAGCAAATCCAAAATTCATATACACTCAACACGACCAATTGTAT
TATATTCCTAACAATCCAGCAAATCCAAAATTCATATACACTCAACACGACCAATTGTAT
*****

AB212830.1
NC_044378.1:25821957-25823591
QKVJ02004887.1:13943-15577
MNPR01002882.1:12890-14524
MXBD01006695.1:30197-31831
AGQN03005496.1:2986-4620
QVPT02000161.1:1531540-1533174
MW429551

ATGTCGTGCTCGAATTCGACAATACAAAATCTTAGATTACCTCTGATACAACCCCAAAA
ATGTCGTGCTCGAATTCGACAATACAAAATCTTAGATTACCTCTGATACAACCCCAAAA
ATGTCGTGCTCGAATTCGACAATACAAAATCTTAGATTACCTCTGATACAACCCCAAAA
ATGTCGTGCTCGAATTCGACAATACAAAATCTTAGATTACCTCTGATACAACCCCAAAA
ATGTCGTGCTCGAATTCGACAATACAAAATCTTAGATTACCTCTGATACAACCCCAAAA
ATGTCGTGCTCGAATTCGACAATACAAAATCTTAGATTACCTCTGATACAACCCCAAAA
ATGTCGTGCTCGAATTCGACAATACAAAATCTTAGATTACCTCTGATACAACCCCAAAA
*****

AB212830.1
NC_044378.1:25821957-25823591
QKVJ02004887.1:13943-15577
MNPR01002882.1:12890-14524
MXBD01006695.1:30197-31831
AGQN03005496.1:2986-4620
QVPT02000161.1:1531540-1533174
MW429551

CCACTCGTTATTGTCACTCCTTCAAATGCTCTCCCATATCCAGGCCAGTATTCTCTGCTCC
CCACTCGTTATTGTCACTCCTTCAAATGCTCTCCCATATCCAGGCCAGTATTCTCTGCTCC
CCACTCGTTATTGTCACTCCTTCAAATGCTCTCCCATATCCAGGCCAGTATTCTCTGCTCC
CCACTCGTTATTGTCACTCCTTCAAATGCTCTCCCATATCCAGGCCAGTATTCTCTGCTCC
CCACTCGTTATTGTCACTCCTTCAAATGCTCTCCCATATCCAGGCCAGTATTCTCTGCTCC
CCACTCGTTATTGTCACTCCTTCAAATGCTCTCCCATATCCAGGCCAGTATTCTCTGCTCC
CCACTCGTTATTGTCACTCCTTCAAATGCTCTCCCATATCCAGGCCAGTATTCTCTGCTCC
*****

AB212830.1
NC_044378.1:25821957-25823591
QKVJ02004887.1:13943-15577
MNPR01002882.1:12890-14524
MXBD01006695.1:30197-31831
AGQN03005496.1:2986-4620
QVPT02000161.1:1531540-1533174
MW429551

AAGAAAGTTGGTTTGCAGATTCTGAAGCGGTGGCCATGATGCTGAGGGTTTGTCC
AAGAAAGTTGGTTTGCAGATTCTGAAGCGGTGGCCATGATGCTGAGGGTTTGTCC
AAGAAAGTTGGTTTGCAGATTCTGAAGCGGTGGCCATGATGCTGAGGGTTTGTCC
AAGAAAGTTGGTTTGCAGATTCTGAAGCGGTGGCCATGATGCTGAGGGTTTGTCC
AAGAAAGTTGGTTTGCAGATTCTGAAGCGGTGGCCATGATGCTGAGGGTTTGTCC
AAGAAAGTTGGTTTGCAGATTCTGAAGCGGTGGCCATGATGCTGAGGGTTTGTCC
AAGAAAGTTGGTTTGCAGATTCTGAAGCGGTGGCCATGATGCTGAGGGTTTGTCC
*****

AB212830.1
NC_044378.1:25821957-25823591
QKVJ02004887.1:13943-15577
MNPR01002882.1:12890-14524
MXBD01006695.1:30197-31831
AGQN03005496.1:2986-4620
QVPT02000161.1:1531540-1533174
MW429551

TACATATCTCAAGTCCCATTGCTATAGTAGACTTGAGAAACATGCATACGGTCAAAGTA
TACATATCTCAAGTCCCATTGCTATAGTAGACTTGAGAAACATGCATACGGTCAAAGTA
TACATATCTCAAGTCCCATTGCTATAGTAGACTTGAGAAACATGCATACGGTCAAAGTA
TACATATCTCAAGTCCCATTGCTATAGTAGACTTGAGAAACATGCATACGGTCAAAGTA
TACATATCTCAAGTCCCATTGCTATAGTAGACTTGAGAAACATGCATACGGTCAAAGTA
TACATATCTCAAGTCCCATTGCTATAGTAGACTTGAGAAACATGCATACGGTCAAAGTA
TACATATCTCAAGTCCCATTGCTATAGTAGACTTGAGAAACATGCATACGGTCAAAGTA
*****

AB212830.1
GATATTCATAGCCAACTGCGTGGGTTGAAGCCGAGCTACCTTGAGAGAAGTTTATTAT
```

AB212830.1  
NC\_044378.1:25821957-25823591  
MKVJ02004887.1:13943-15577  
MNPR01002882.1:12890-14524  
MXBD01006695.1:30197-31831  
AGQN03005496.1:2986-4620  
QVPT02000161.1:1531540-1533174  
MW429551

[illegible]

AB212830.1  
NC\_044378.1:25821957-25823591  
QKVVJ02004887.1:13943-15577  
MNPR01002882.1:12890-14524  
MXBD01006695.1:30197-31831  
AGQN03005496.1:2986-4620  
OVPT02000161.1:1531540-1533174

[illegible]

TATGAACTTTGGTACACTGCTACCTGGGAGAAGCAAGAAGATAACGAAAAGCATATAAAC  
\*\*\*\*\*

TGGGTTCGAAGTGTTTATAATTTCACAACTCCTTATGTGTCCCAAAATCCAAGATTGGCG  
TGGGTTCGAAGTGTTTATAATTTCACAACTCCTTGTGTGTCCCAAAATCCAAGATTGGCG  
TGGGTTCGAAGTGTTTATAATTTCACAACTCCTTGTGTGTCCCAAAATCCAAGATTGGCG  
TGGGTTCGAAGTGTTTATAATTTCACAACTCCTTATGTGTGTCCCAAAATCCAAGATTGGCG  
TGGGTTCGAAGTGTTTATAATTTCACAACTCCTTATGTGTGTCCCAAAATCCAAGATTGGCG  
TGGGTTCGAAGTGTTTATAATTTCACAACTCCTTATGTGTGTCCCAAAATCCAAGATTGGCG  
TGGGTTCGAAGTGTTTATAATTTCACAACTCCTTATGTGTGTCCCAAAATCCAAGATTGGCG  
TGGGTTCGAAGTGTTTATAATTTCACAACTCCTTATGTGTGTCCCAAAATCCAAGATTGGCG  
\*\*\*\*\*

TATCTCAATTATAGGGACCTTGATTTAGGAAAACTAATCCTGAGAGTCCTAATAATTAC  
TATCTCAATTATAGGGACCTTGATTTAGGAAAATCTAATCCTGAGAGTCCTAATAATTAC  
TATCTCAATTATAGGGACCTTGATTTAGGAAAATCTAATCCTGAGAGTCCTAATAATTAC  
TATCTCAATTATAGGGACCTTGATTTAGGAAAACTAATCCTGAGAGTCCTAATAATTAC  
TATCTCAATTATAGGGACCTTGATTTAGGAAAACTAATCCTGAGAGTCCTAATAATTAC  
TATCTCAATTATAGGGACCTTGATTTAGGAAAACTAATCCTGAGAGTCCTAATAATTAC  
TATCTCAATTATAGGGACCTTGATTTAGGAAAACTAATCCTGAGAGTCCTAATAATTAC  
TATCTCAATTATAGGGACCTTGATTTAGGAAAACTAATCCTGAGAGTCCTAATAATTAC  
\*\*\*\*\*

[illegible][illegible][illegible]

Input sequences:

((5'3') indicates that the downloaded sequences have been converted into their respective inverse complement to perform the alignment)

>MNPR01002882.1:12890-14524 Cannabis sativa cultivar Cannatonic

Cannabis.v1\_scf2882\_q, whole genome shotgun sequence

```
ATGAATTGCTCAACATTCTCCTTTTGGTTTGTTCGAAAATAATATTTTTCTTTCTCTCA
TTCAATATCCAAATTTCAATAGCTAATCCTCAAGAAAACCTTCCTTAAATGCTTCTCGGAA
TATATTCCCTAACAAATCCAGCAAATCCAAAATTCATATACACTCAACACGACCAATTGTAT
ATGTCTGTCTGAATTTCGACAATACAAAATCTTAGATTACCTCTGATACAACCCCCAAA
CCACTCGTTATTGTCACTCCTTCAAATGTCTCCCATATCCAGGCCAGTATTCTCTGCTCC
AAGAAAGTTGGTTTGCAGATTTCGAACCTCGAAGCGGTGGCCATGATGCTGAGGGTTTGTCC
TACATATCTCAAGTCCCATTGTCTATAGTAGACTTGAGAAACATGCATACGGTCAAAGTA
GATATTTCATAGCCAAACTGCGTGGGTTGAAGCCGGAGCTACCCTTGGAGAAGTTTATTAT
TGGATCAATGAGATGAATGAGAATTTTAGTTTTCTGGTGGGTATTGCCCTACTGTTGGC
GTAGGTGGACACTTTTAGTGGAGGAGGCTATGGAGCATTGATGCGAAATTATGGCCTTGCG
GCTGATAATATCATTGATGCACACTTAGTCAATGTTGATGGAAAAGTTCTAGATCGAAAA
TCCATGGGAGAAGATCTATTTTGGGCTATACGTGGTGGAGGAGGAGAAAACCTTTGGAATC
ATTGCAGCATGGAAAATCAAACCTTGTTGTTGTCCCATCAAAGGCTACTATATTCAGTGTT
AAAAAGAACATGGAGATACATGGGCTTGTCAGTTATTTAACAAATGGCAAATATTGCT
TACAAGTATGACAAAGATTTAATGCTCACGACTCACTTCAGAACTAGGAATATTACAGAT
AATCATGGGAAGAATAAGACTACAGTACATGGTTACTTCTCTTCCATTTTTCTTGGTGGA
GTGGATAGTCTAGTTGACTTGATGAACAAGAGCTTTCCTGAGTTGGGTATTAAAAAACT
GATTGCAAAGAATTGAGCTGGATTGATACAACCATCTTCTACAGTGGTGTGTAAATTAC
AACACTGCTAATTTTAAAAAGGAAATTTTGCTTGATAGATCAGCTGGGAAGAAGACGGCT
TTCTCAATTAAGTTAGACTATGTTAAGAACTAATACCTGAACTGCAATGGTCAAAATT
TTGGAAAAATTATATGAAGAAGAGGTAGGAGTTGGGATGTATGTGTTGTACCCTTACGGT
GGTATAATGGATGAGATTTTCAAGATCAGCAATTCATTCCTCATCGAGCTGGAATAATG
TATGAACTTTGGTACACTGCTACCTGGGAGAAGCAAGAAGATAACGAAAAGCATATAAAC
TGGGTTTCGAAGTGTTTATAATTTTACAACCTCCTTATGTGTCCCAAATCCAAGATTGGCG
TATCTCAATTATAGGGACCTTGATTTAGGAAAAACTAATCCTGAGAGTCCTAATAATTAC
ACACAAGCACGTATTTTGGGGTGAAGAGTATTTTGGTAAAAATTTTAAACAGGTTAGTTAAG
GTGAAAACCAAAGCTGATCCCAATAATTTTTTTTAGAAACGAACAAAGTATCCCACCTCTT
CCACCGCGTCATCAT
```

>MXBD01006695.1:30197-31831 Cannabis sativa cultivar Pineapple Banana Bubba Kush

006705Cannabis\_1597M\_SHL, whole genome shotgun sequence (5'3')

```
ATGAATTGCTCAACATTCTCCTTTTGGTTTGTTCGAAAATAATATTTTTCTTTCTCTCA
TTCAATATCCAAATTTCAATAGCTAATCCTCAAGAAAACCTTCCTTAAATGCTTCTCGGAA
TATATTCCCTAACAAATCCAGCAAATCCAAAATTCATATACACTCAACACGACCAATTGTAT
ATGTCTGTCTGAATTTCGACAATACAAAATCTTAGATTACCTCTGATACAACCCCCAAA
CCACTCGTTATTGTCACTCCTTCAAATGTCTCCCATATCCAGGCCAGTATTCTCTGCTCC
AAGAAAGTTGGTTTGCAGATTTCGAACCTCGAAGCGGTGGCCATGATGCTGAGGGTTTGTCC
TACATATCTCAAGTCCCATTGTCTATAGTAGACTTGAGAAACATGCATACGGTCAAAGTA
GATATTTCATAGCCAAACTGCGTGGGTTGAAGCCGGAGCTACCCTTGGAGAAGTTTATTAT
TGGATCAATGAGATGAATGAGAATTTTAGTTTTCTGGTGGGTATTGCCCTACTGTTGGC
GTAGGTGGACACTTTTAGTGGAGGAGGCTATGGAGCATTGATGCGAAATTATGGCCTTGCG
GCTGATAATATCATTGATGCACACTTAGTCAATGTTGATGGAAAAGTTCTAGATCGAAAA
TCCATGGGAGAAGATCTATTTTGGGCTATACGTGGTGGAGGAGGAGAAAACCTTTGGAATC
ATTGCAGCATGGAAAATCAAACCTTGTTGTTGTCCCATCAAAGGCTACTATATTCAGTGTT
AAAAAGAACATGGAGATACATGGGCTTGTCAGTTATTTAACAAATGGCAAATATTGCT
TACAAGTATGACAAAGATTTAATGCTCACGACTCACTTCAGAACTAGGAATATTACAGAT
AATCATGGGAAGAATAAGACTACAGTACATGGTTACTTCTCTTCCATTTTTCTTGGTGGA
GTGGATAGTCTAGTTGACTTGATGAACAAGAGCTTTCCTGAGTTGGGTATTAAAAAACT
GATTGCAAAGAATTGAGCTGGATTGATACAACCATCTTCTACAGTGGTGTGTAAATTAC
AACACTGCTAATTTTAAAAAGGAAATTTTGCTTGATAGATCAGCTGGGAAGAAGACGGCT
TTCTCAATTAAGTTAGACTATGTTAAGAACTAATACCTGAACTGCAATGGTCAAAATT
TTGGAAAAATTATATGAAGAAGAGGTAGGAGTTGGGATGTATGTGTTGTACCCTTACGGT
GGTATAATGGATGAGATTTTCAAGATCAGCAATTCATTCCTCATCGAGCTGGAATAATG
TATGAACTTTGGTACACTGCTACCTGGGAGAAGCAAGAAGATAACGAAAAGCATATAAAC
TGGGTTTCGAAGTGTTTATAATTTTACAACCTCCTTATGTGTCCCAAATCCAAGATTGGCG
TATCTCAATTATAGGGACCTTGATTTAGGAAAACTAATCCTGAGAGTCCTAATAATTAC
ACACAAGCACGTATTTTGGGGTGAAGAGTATTTTGGTAAAAATTTTAAACAGGTTAGTTAAG
```

GTGAAAACCAAAGCTGATCCCAATAATTTTTTTTAGAAACGAACAAAGTATCCCACCTCTT  
CCACCGCGTCATCAT

>AGQN03005496.1:2986-4620 Cannabis sativa cultivar Purple Kush 005500F, whole  
genome shotgun sequence (5'3')

ATGAATTGCTCAACATTCTCCTTTTGGTTTGTGTTGCAAAATAATATTTTTCTTTCTCTCA  
TTCAATATCCAAATTTCAATAGCTAATCCTCAAGAAAACCTTCCTTAAATGCTTCTCGGAA  
TATATTCCCTAACAAATCCAGCAAATCCAAAATTCATATACACTCAACACGACCAATTGTAT  
ATGTCTGTCCTGAATTCGACAATACAAAATCTTAGATTACCTCTGATACAACCCCCAAAA  
CCACTCGTTATTGTCACTCCTTCAAATGTCTCCCATATCCAGGCCAGTATTCTCTGCTCC  
AAGAAAAGTTGGTTTGCAGATTGCAACTCGAAGCGGTGGCCATGATGCTGAGGGTTTGTCC  
TACATATCTCAAGTCCCATTTGCTATAGTAGACTTGAGAAACATGCATACGGTCAAAGTA  
GATATTCATAGCCAAACTGCGTGGGTTGAAGCCGGAGCTACCCCTGGAGAAGTTTATTAT  
TGGATCAATGAGATGAATGAGAATTTTAGTTTTCTGGTGGGTATTGCCCTACTGTTGGC  
GTAGGTGGACACTTTAGTGGAGGAGGCTATGGAGCATTGATGCGAAATTATGGCCTTGCG  
GCTGATAATATCATTGATGCACACTTAGTCAATGTTGATGGAAAAGTTCTAGATCGAAAA  
TCCATGGGAGAAGATCTATTTTGGGCTATACGTGGTGGAGGAGGAGAAAACCTTTGGAATC  
ATTGCAGCATGGAAAATCAAACCTTGTGTTGTCCCATCAAAGGCTACTATATTCAGTGTT  
AAAAAGAACATGGAGATACATGGGCTTGTCAAGTTATTTAACAAATGGCAAATATTGCT  
TACAAGTATGACAAAGATTTAATGCTCACGACTCACTTCAGAACTAGGAATATTACAGAT  
AATCATGGGAAGAATAAGACTACAGTACATGGTTACTTCTCTTCCATTTTTCTTGGTGGA  
GTGGATAGTCTAGTTGACTTGATGAACAAGAGCTTTCCTGAGTTGGGTATTAAAAAACT  
GATTGCAAAGAATTGAGCTGGATTGATACAACCATCTTCTACAGTGGTGTGTAAATTAC  
AACACTGCTAATTTTAAAAAGGAAATTTTGCTTGATAGATCAGCTGGGAAGAAGACGGCT  
TTCTCAATTAAGTTAGACTATGTTAAGAACTAATACCTGAACTGCAATGGTCAAATTT  
TTGGAAAAATTATATGAAGAAGAGGTAGGAGTTGGGATGTATGTGTTGTACCCTTACGGT  
GGTATAATGGATGAGATTTTCAAGATCAGCAATTCATTCCCTCATCGAGCTGGAATAATG  
TATGAACCTTTGGTACACTGCTACCTGGGAGAAGCAAGAAGATAACGAAAAGCATATAAAC  
TGGGTTTCGAAGTGTTTATAATTTTCAACTCCTTATGTGTCCCAAATCCAAGATTGGCG  
TATCTCAATTATAGGGACCTTGATTTAGGAAAACTAATCCTGAGAGTCCTAATAATTAC  
ACACAAGCACGTATTTGGGGTGAAAAGTATTTTGGTAAAAATTTTAACAGGTTAGTTAAG  
GTGAAAACCAAAGCTGATCCCAATAATTTTTTTTAGAAACGAACAAAGTATCCCACCTCTT  
CCACCGCGTCATCAT

>QVPT02000161.1:1531540-1533174 Cannabis sativa cultivar Jamaican Lion DASH  
000163F\_arrow, whole genome shotgun sequence (5'3')

ATGAATTGCTCAACATTCTCCTTTTGGTTTGTGTTGCAAAATAATATTTTTCTTTCTCTCA  
TTCAATATCCAAATTTCAATAGCTAATCCTCAAGAAAACCTTCCTTAAATGCTTCTCGGAA  
TATATTCCCTAACAAATCCAGCAAATCCAAAATTCATATACACTCAACACGACCAATTGTAT  
ATGTCTGTCCTGAATTCGACAATACAAAATCTTAGATTACCTCTGATACAACCCCCAAAA  
CCACTCGTTATTGTCACTCCTTCAAATGTCTCCCATATCCAGGCCAGTATTCTCTGCTCC  
AAGAAAAGTTGGTTTGCAGATTGCAACTCGAAGCGGTGGCCATGATGCTGAGGGTTTGTCC  
TACATATCTCAAGTCCCATTTGCTATAGTAGACTTGAGAAACATGCATACGGTCAAAGTA  
GATATTCATAGCCAAACTGCGTGGGTTGAAGCCGGAGCTACCCCTGGAGAAGTTTATTAT  
TGGATCAATGAGATGAATGAGAATTTTAGTTTTCTGGTGGGTATTGCCCTACTGTTGGC  
GTAGGTGGACACTTTAGTGGAGGAGGCTATGGAGCATTGATGCGAAATTATGGCCTTGCG  
GCTGATAATATCATTTGATGCACACTTAGTCAATGTTGATGGAAAAGTTCTAGATCGAAAA  
TCCATGGGAGAAGATCTATTTTGGGCTATACGTGGTGGAGGAGGAGAAAACCTTTGGAATC  
ATTGCAGCATGGAAAATCAAACCTTGTGTTGTCCCATCAAAGGCTACTATATTCAGTGTT  
AAAAAGAACATGGAGATACATGGGCTTGTCAAGTTATTTAACAAATGGCAAATATTGCT  
TACAAGTATGACAAAGATTTAATGCTCACGACTCACTTCAGAACTAGGAATATTACAGAT  
AATCATGGGAAGAATAAGACTACAGTACATGGTTACTTCTCTTCCATTTTTCTTGGTGGA  
GTGGATAGTCTAGTTGACTTGATGAACAAGAGCTTTCCTGAGTTGGGTATTAAAAAACT  
GATTGCAAAGAATTGAGCTGGATTGATACAACCATCTTCTACAGTGGTGTGTAAATTAC  
AACACTGCTAATTTTAAAAAGGAAATTTTGCTTGATAGATCAGCTGGGAAGAAGACGGCT  
TTCTCAATTAAGTTAGACTATGTTAAGAACTAATACCTGAACTGCAATGGTCAAATTT  
TTGGAAAAATTATATGAAGAAGAGGTAGGAGTTGGGATGTATGTGTTGTACCCTTACGGT  
GGTATAATGGATGAGATTTTCAAGATCAGCAATTCATTCCCTCATCGAGCTGGAATAATG  
TATGAACCTTTGGTACACTGCTACCTGGGAGAAGCAAGAAGATAACGAAAAGCATATAAAC  
TGGGTTTCGAAGTGTTTATAATTTTCAACTCCTTATGTGTCCCAAATCCAAGATTGGCG  
TATCTCAATTATAGGGACCTTGATTTAGGAAAACTAATCCTGAGAGTCCTAATAATTAC  
ACACAAGCACGTATTTGGGGTGAAAAGTATTTTGGTAAAAATTTTAACAGGTTAGTTAAG  
GTGAAAACCAAAGCTGATCCCAATAATTTTTTTTAGAAACGAACAAAGTATCCCACCTCTT  
CCACCGCGTCATCAT

>NC\_044378.1:25821957-25823591 Cannabis sativa chromosome 7, cs10

ATGAATTGCTCAACATTCTCCTTTTGGTTTGTGTTGCAAAATAATATTTTTCTTTCTCTCA  
TTCAATATCCAAATTTCAATAGCTAATCCTCAAGAAAACCTCCTTAAATGCTTCTCGGAA  
TATATTCCCTAACAAATCCAGCAAATCCAAAATTCATATACACTCAACACGACCAATTGTAT  
ATGTCTGTCTGAATTCGACAATACAAAATCTTAGATTACCTCTGATACAACCCCCAAA  
CCACTCGTTATTGTCACTCCTTCAAATGTCTCCCATATCCAGGCCAGTATTCTCTGCTCC  
AAGAAAGTTGGTTTGCAGATTGCAACTCGAAGCGGTGGCCATGATGCTGAGGGTTTGTCC  
TACATATCTCAAGTCCCATTTGCTATAGTAGACTTGAGAAACATGCATACGGTCAAAGTA  
GATATTTCATAGCCAAACTGCGTGGGTGAAGCCGGAGCTACCTTGGAGAAGTTTATTAT  
TGGATCAATGAGATGAATGAGAATTTTAGTTTTCTGGTGGGTATTGCCCTACTGTTGGC  
GTAGGTGGACACTTTAGTGGAGGAGGCTATGGAGCATTGATGCGAAATTATGGCCTTGCG  
GCTGATAATATCATTGATGCACACTTAGTCAATGTTGATGGAAAAGTTCTAGATCGAAAA  
TCCATGGGAGAAGATCTATTTTGGGCTATACGTGGTGGAGGAGGAGAAAACCTTTGGAATC  
ATTGCAGCATGGAAAATCAAACCTTGTGTTGTCCCATCAAAGGCTACTATATTCAGTGTT  
AAAAAGAACATGGAGATACATGGGCTTGTCAAGTTATTTAACAAATGGCAAATATTGCT  
TACAAGTATGACAAAGATTTAATGCTCACGACTCACTTCAGAACTAGGAATATTACAGAT  
AATCATGGGAAGAATAAGACTACAGTACATGGTTACTTCTCTTCCATTTTTCTTGGTGGA  
GTGGATAGTCTAGTTGACTTGATGAACAAGAGCTTTCCTGAGTTGGGTATTAAAAAACT  
GATTGCAAAGAATTGAGCTGGATTGATACAACCATCTTCTACAGTGGTGTGTAAATTAC  
AACACTGCTAATTTTAAAAAGGAAATTTTGCTTGATAGATCAGCTGGGAAGAAGACGGCT  
TTCTCAATTAAGTTAGACTATGTTAAGAACTAATACCTGAACTGCAATGGTCAAATTT  
TTGGAAAAATTATATGAAGAAGAGGTAGGAGTTGGGATGTATGTGTTGTACCCTTACGAT  
GGTATAATGGATGAGATTTTCAAGATCAGCAATTCATTTCCCTCATCGAGCTGGAATAATG  
TATGAACTTTGGTACACTGCTACCTGGGAGAAGCAAGAAGATAACGAAAAGCATATAAAC  
TGGGTTTCGAAGTGTTTATAATTTTCAACCTCCTTGTGTGTCCCAAATCCAAGATTGGCG  
TATCTCAATTATAGGGACCTTGATTTAGGAAAATCTAATCCTGAGAGTCCTAATAATTAC  
ACACAAGCACGTATTTGGGGTGAAAAGTATTTTGGTAAAAATTTTAACAGGTTAGTTAAG  
GTGAAAACCAAAGCTGATCCCAATAATTTTTTTTAGAAACGAACAAAGTATCCCACCTCTT  
CCACCGCGTCATCAT

>QKVJ02004887.1:13943-15577 Cannabis sativa cultivar Finola 004887F, whole  
genome shotgun sequence (5'3')

ATGAATTGCTCAACATTCTCCTTTTGGTTTGTGTTGCAAAATAATATTTTTCTTTCTCTCA  
TTCAATATCCAAATTTCAATAGCTAATCCTCAAGAAAACCTCCTTAAATGCTTCTCGGAA  
TATATTCCCTAACAAATCCAGCAAATCCAAAATTCATATACACTCAACACGACCAATTGTAT  
ATGTCTGTCTGAATTCGACAATACAAAATCTTAGATTACCTCTGATACAACCCCCAAA  
CCACTCGTTATTGTCACTCCTTCAAATGTCTCCCATATCCAGGCCAGTATTCTCTGCTCC  
AAGAAAGTTGGTTTGCAGATTGCAACTCGAAGCGGTGGCCATGATGCTGAGGGTTTGTCC  
TACATATCTCAAGTCCCATTTGCTATAGTAGACTTGAGAAACATGCATACGGTCAAAGTA  
GATATTTCATAGCCAAACTGCGTGGGTGAAGCCGGAGCTACCTTGGAGAAGTTTATTAT  
TGGATCAATGAGATGAATGAGAATTTTAGTTTTCTGGTGGGTATTGCCCTACTGTTGGC  
GTAGGTGGACACTTTAGTGGAGGAGGCTATGGAGCATTGATGCGAAATTATGGCCTTGCG  
GCTGATAATATCATTGATGCACACTTAGTCAATGTTGATGGAAAAGTTCTAGATCGAAAA  
TCCATGGGAGAAGATCTATTTTGGGCTATACGTGGTGGAGGAGGAGAAAACCTTTGGAATC  
ATTGCAGCATGGAAAATCAAACCTTGTGTTGTGCCATCAAAGGCTACTATATTCAGTGTT  
AAAAAGAACATGGAGATACATGGGCTTGTCAAGTTATTTAACAAATGGCAAATATTGCT  
TACAAGTATGACAAAGATTTAATGCTCACGACTCACTTCAGAACTAGGAATATTACAGAT  
AATCATGGGAAGAATAAGACTACAGTACATGGTTACTTCTCTTCCATTTTTCTTGGTGGA  
GTGGATAGTCTAGTTGACTTGATGAACAAGAGCTTTCCTGAGTTGGGTATTAAAAAACT  
GATTGCAAAGAATTGAGCTGGATTGATACAACCATCTTCTACAGTGGTGTGTAAATTAC  
AACACTGCTAATTTTAAAAAGGAAATTTTGCTTGATAGATCAGCTGGGAAGAAGACGGCT  
TTCTCAATTAAGTTAGACTATGTTAAGAACTAATACCTGAACTGCAATGGTCAAATTT  
TTGGAAAAATTATATGAAGAAGAGGTAGGAGTTGGGATGTATGTGTTGTACCCTTACGAT  
GGTATAATGGATGAGATTTTCAAGATCAGCAATTCATTTCCCTCATCGAGCTGGAATAATG  
TATGAACTTTGGTACACTGCTACCTGGGAGAAGCAAGAAGATAACGAAAAGCATATAAAC  
TGGGTTTCGAAGTGTTTATAATTTTCAACCTCCTTGTGTGTCCCAAATCCAAGATTGGCG  
TATCTCAATTATAGGGACCTTGATTTAGGAAAATCTAATCCTGAGAGTCCTAATAATTAC  
ACACAAGCACGTATTTGGGGTGAAAAGTATTTTGGTAAAAATTTTAACAGGTTAGTTAAG  
GTGAAAACCAAAGCTGATCCCAATAATTTTTTTTAGAAACGAACAAAGTATCCCACCTCTT  
CCACCGCGTCATCAT

>AB212830.1 Cannabis sativa gene for tetrahydrocannabinolic acid synthase,  
partial cds

ATGAATTGCTCAGCATTTTCTTTTGGTTTGTGTTGCAAAATAATATTTTTCTTTCTCTCA  
TTCAATATCCAAATTTCAATAGCTAATCCTCAAGAAAACCTCCTTAAATGCTTCTCGGAA  
TATATTCCCTAACAAATCCAGCAAATCCAAAATTCATATACACTCAACACGACCAATTGTAT

ATGTCTGTCCTGAATTCGACAATACAAAATCTTAGATTACCTCTGATACAACCCCCAAA  
CCACTCGTTATTGTCACCTCCTTCAAATGTCTCCCATATCCAGGCCAGTATTCTCTGCTCC  
AAGAAAGTTGGTTTGCAGATTGCAACTCGAAGCGGTGGCCATGATGCTGAGGGTTTGTCC  
TACATATCTCAAGTCCCATTTGCTATAGTAGACTTGAGAAACATGCATACGGTCAAAGTA  
GATATTCATAGCCAAACTGCGTGGGTGAAGCCGGAGCTACCTTGGAGAAGTTTATTAT  
TGGATCAATGAGATGAATGAGAATTTTAGTTTTCTGGTGGGTATTGCCCTACTGTTGGC  
GTAGGTGGACACTTTAGTGGAGGAGGCTATGGAGCATTGATGCGAAATTATGGCCTTGCG  
GCTGATAATATCATTGATGCACACTTAGTCAATGTTGATGGAAAAGTTCTAGATCGAAAA  
TCCATGGGAGAAGATCTATTTTGGGCTATACGTGGTGGAGGAGGAGAAAACTTTGGAATC  
ATTGCAGCATGGAAAATCAAACCTTGTTGTTGTCCCATCAAAGGCTACTATATTCAGTGTT  
AAAAAGAACATGGAGATACATGGGCTTGTCAGTTATTTAACAAATGGCAAAATATTGCT  
TACAAGTATGACAAAGATTTAATGCTCACGACTCACTTCAGAACTAGGAATATTACAGAT  
AATCATGGGAAGAATAAGACTACAGTACATGGTTACTTCTCTTCCATTTTTCTTGGTGGA  
GTGGATAGTCTAGTTGACTTGATGAACAAGAGCTTTCCTGAGTTGGGTATTAAAAAACT  
GATTGCAAAGAATTGAGCTGGATTGATACAACCATCTTCTACAGTGGTGTTGTAAATTAC  
AACACTGCTAATTTTAAAAAGGAAATTTTGCTTGATAGATCAGCTGGGAAGAAGACGGCT  
TTCTCAATTAAGTTAGACTATGTTAAGAACTAATACCTGAACTGCAATGGTCAAATTT  
TTGGAAAAATTATATGAAGAAGAGGTAGGAGTTGGGATGTATGTGTTGTACCCTTACGGT  
GGTATAATGGATGAGATTTTCAAGATCAGCAATCCATTCCTCATCGAGCTGGAATAATG  
TATGAACTTTGGTACACTGCTACCTGGGAGAAGCAAGAAGATAACGAAAAGCATATAAAC  
TGGGTTTCGAAGTGTTTATAATTTTCAACTCCTTATGTGTCCCAAATCCAAGATTGGCG  
TATCTCAATTATAGGGACCTTGATTTAGGAAAACTAATCCTGAGAGTCCTAATAATTAC  
ACACAAGCACGTATTTGGGGTGAAAAGTATTTTGGTAAAAATTTTAACAGGTTAGTTAAG  
GTGAAAACCAAAGCTGATCCCAATAATTTTTTTTAGAAACGAACAAAGTATCCCACCTCTT  
CCACCGCATCATCAT

>MW429551

ATGAATTGCTCAACATTCTCCTTTTGGTTTGTGTTGCAAAATAATATTTTTCTTTCTCTCA  
TTCAATATCCAAATTTCAATAGCTAATCCTCAAGAAAACCTCCTTAAATGCTTCTCGGAA  
TATATTCCTAACAATCCAGCAAATCCAAATTCATATACACTCAACACGACCAATTGTAT  
ATGTCTGTCCTGAATTCGACAATACAAAATCTTAGATTACCTCTGATACAACCCCCAAA  
CCACTCGTTATTGTCACCTCCTTCAAATGTCTCCCATATCCAGGCCAGTATTCTCTGCTCC  
AAGAAAGTTGGTTTGCAGATTGCAACTCGAAGCGGTGGCCATGATGCTGAGGGTTTGTCC  
TACATATCTCAAGTCCCATTTGCTATAGTAGACTTGAGAAACATGCATACGGTCAAAGTA  
GATATTCATAGCCAAACTGCGTGGGTGAAGCCGGAGCTACCTTGGAGAAGTTTATTAT  
TGGATCAATGAGATGAATGAGAATTTTAGTTTTCTGGTGGGTATTGCCCTACTGTTGGC  
GTAGGTGGACACTTTAGTGGAGGAGGCTATGGAGCATTGATGCGAAATTATGGCCTTGCG  
GCTGATAATATCATTGATGCACACTTAGTCAATGTTGATGGAAAAGTTCTAGATCGAAAA  
TCCATGGGAGAAGATCTATTTTGGGCTATACGTGGTGGAGGAGGAGAAAACTTTGGAATC  
ATTGCAGCATGGAAAATCAAACCTTGTTGTTGTCCCATCAAAGGCTACTATATTCAGTGTT  
AAAAAGAACATGGAGATACATGGGCTTGTCAGTTATTTAACAAATGGCAAAATATTGCT  
TACAAGTATGACAAAGATTTAATGCTCACGACTCACTTCAGAACTAGGAATATTACAGAT  
AATCATGGGAAGAATAAGACTACAGTACATGGTTACTTCTCTTCCATTTTTCTTGGTGGA  
GTGGATAGTCTAGTTGACTTGATGAACAAGAGCTTTCCTGAGTTGGGTATTAAAAAACT  
GATTGCAAAGAATTGAGCTGGATTGATACAACCATCTTCTACAGTGGTGTTGTAAATTAC  
AACACTGCTAATTTTAAAAAGGAAATTTTGCTTGATAGATCAGCTGGGAAGAAGACGGCT  
TTCTCAATTAAGTTAGACTATGTTAAGAACTAATACCTGAACTGCAATGGTCAAATTT  
TTGGAAAAATTATATGAAGAAGAGGTAGGAGTTGGGATGTATGTGTTGTACCCTTACGGT  
GGTATAATGGATGAGATTTTCAAGATCAGCAATTCATTCCTCATCGAGCTGGAATAATG  
TATGAACTTTGGTACACTGCTACCTGGGAGAAGCAAGAAGATAACGAAAAGCATATAAAC  
TGGGTTTCGAAGTGTTTATAATTTTCAACTCCTTATGTGTCCCAAATCCAAGATTGGCG  
TATCTCAATTATAGGGACCTTGATTTAGGAAAACTAATCCTGAGAGTCCTAATAATTAC  
ACACAAGCACGTATTTGGGGTGAAAAGTATTTTGGTAAAAATTTTAACAGGTTAGTTAAG  
GTGAAAACCAAAGCTGATCCCAATAATTTTTTTTAGAAACGAACAAAGTATCCCACCTCTT  
CCACCGCGTCATCAT
