# Supplementary material for: Analysis of Sequence Variability and Transcriptional Profile of Cannabinoid synthase Genes in Cannabis sativa L. Chemotypes with a Focus on Cannabichromenic acid synthase
Source: Plants (Basel). 2021 Sep 8;10(9):1857. doi: 10.3390/plants10091857 (PMC8466818; doi:10.3390/plants10091857)
Supplement: Supplementary file 1 [file plants-10-01857-s001.zip › Supplementary File 2.pdf]

# Analysis of sequence variability and transcriptional profile of *cannabinoid synthase* genes in *Cannabis sativa* L. chemotypes with a focus on *cannabichromenic acid synthase*

Flavia Fulvio<sup>1,2</sup>, Roberta Paris<sup>1\*</sup>, Massimo Montanari<sup>1</sup>, Cinzia Citti<sup>3,4</sup>, Vincenzo Cilento<sup>1</sup>, Laura Bassolino<sup>1</sup>, Anna Moschella<sup>1</sup>, Ilaria Alberti<sup>5</sup>, Nicola Pecchioni<sup>6</sup>, Giuseppe Cannazza<sup>3,4</sup> and Giuseppe Mandolino<sup>1</sup>

1 CREA-Research Center for Cereal and Industrial Crops, Via di Corticella 133, 40128 Bologna, Italy

2 Department of Sciences of Agriculture, Food Natural resources and Engineering, University of Foggia, Via Napoli 25, 71122 Foggia, Italy

3 CNR NANOTEC – Institute of Nanotechnology, Via Monteroni, 73100, Lecce, Italy

4 Department of Life Science, University of Modena and Reggio Emilia, Via G. Campi 103, 41125, Modena, Italy

5 CREA-Research Center for Cereal and Industrial Crops, Via G. Amendola 82, 45100 Rovigo, Italy

6 CREA-Research Center for Cereal and Industrial Crops, S.S. 673 Km 25,200, 71122, Foggia, Italy

\* Correspondence: roberta.paris@crea.gov.it

## SAMPLE

|                                                                      |                                                                                                                                                                   |
|----------------------------------------------------------------------|-------------------------------------------------------------------------------------------------------------------------------------------------------------------|
| Description                                                          | Inflorescences of Cannabis grown outdoor                                                                                                                          |
| Microdissection or macrodissection                                   | Macrodissection                                                                                                                                                   |
| Processing procedure                                                 | Samples were immediately frozen in liquid nitrogen, then conserved at -80°C until extraction. Before extraction they were powdered with mortar in liquid nitrogen |
| Sample storage conditions and duration (especially for FFPE samples) | Up to four weeks at -80°C                                                                                                                                         |

## NUCLEIC ACID EXTRACTION

|                                              |                                              |
|----------------------------------------------|----------------------------------------------|
| Procedure and/or instrumentation             | Extraction via commercial kit                |
| Name of kit and details of any modifications | Spectrum™ Plant Total RNA Kit                |
| Details of DNase or RNase treatment          | DNase I                                      |
| Contamination assessment (DNA or RNA)        | No reverse transcription controls            |
| Nucleic acid quantification                  | Absorbance                                   |
| Instrument and method                        | Infinite 200 PRO spectrophotometer (TECAN)   |
| RNA integrity method/instrument              | Evaluated on agarose gel stained with gelred |

## REVERSE TRANSCRIPTION

|                              |                                                                                                                                                                                                                                               |
|------------------------------|-----------------------------------------------------------------------------------------------------------------------------------------------------------------------------------------------------------------------------------------------|
| Complete reaction conditions | RNA samples were added with 2X RT Buffer Mix, 20X RT Enzyme Mix and Nuclease-free H <sub>2</sub> O up to 20 µl per reaction. Then incubate at 37°C for 60 minutes. The reaction was stopped by heating to 95°C for 5 minutes and hold at 4°C. |
|------------------------------|-----------------------------------------------------------------------------------------------------------------------------------------------------------------------------------------------------------------------------------------------|

|                                                          |                                             |
|----------------------------------------------------------|---------------------------------------------|
| Amount of RNA and reaction volume                        | 500 ng total RNA per 20 µl of reaction      |
| Priming oligonucleotide (if using GSP) and concentration | Oligo dT-16 primers                         |
| Reverse transcriptase and concentration                  | MultiScribe™ x (50 U, for 20 µL reactions)  |
| Temperature and time                                     | 60 min at 37°C. 5 min at 95°C. hold at 4°C. |

#### qPCR TARGET

#### INFORMATION

|                                                           |                                                                                        |
|-----------------------------------------------------------|----------------------------------------------------------------------------------------|
| Sequence accession number                                 | Shown in Supplementary Tables S3,S4                                                    |
| Amplicon length                                           | Shown in Table 2                                                                       |
| <i>In silico</i> specificity screen (BLAST, etc)          | Primers were searched by BlastN against Cannabis sativa non-redundant database at NCBI |
| Location of each primer by exon or intron (if applicable) | Working on single exon genes                                                           |

#### qPCR

#### OLIGONUCLEOTIDES

|                                            |                  |
|--------------------------------------------|------------------|
| Primer sequences                           | Shown in Table 2 |
| Location and identity of any modifications | No modifications |

#### qPCR PROTOCOL

|                                               |                                                                                                                                              |
|-----------------------------------------------|----------------------------------------------------------------------------------------------------------------------------------------------|
| Complete reaction conditions                  | Shown in Appendix B                                                                                                                          |
| Reaction volume and amount of cDNA/DNA        | Reaction volume: 10 µl, cDNA volume: 1.5 µl                                                                                                  |
| Primer, (probe), Mg++ and dNTP concentrations | Primer: shown in Table 2, for Mg and dNTP concentration refer to PowerUp SYBR Green MasterMix manufacturer's specifications (Thermo Fisher). |
| Polymerase identity and concentration         | Refer to PowerUp SYBR Green MasterMix manufacturer's specifications.                                                                         |
| Buffer/kit identity and manufacturer          | Refer to PowerUp SYBR Green MasterMix manufacturer's specifications.                                                                         |
| Additives (SYBR Green I, DMSO, etc.)          | SYBR green                                                                                                                                   |
| Complete thermocycling parameters             | Shown in Appendix B                                                                                                                          |
| Manufacturer of qPCR instrument               | RotorGene 6000 (Corbett)                                                                                                                     |

#### qPCR VALIDATION

|                                              |                                                                                                                        |
|----------------------------------------------|------------------------------------------------------------------------------------------------------------------------|
| Specificity (gel, sequence, melt, or digest) | Dissociation curve verification                                                                                        |
| For SYBR Green I, Cq of the NTC              | No amplification detected for NTCs                                                                                     |
| Standard curves with slope and y-intercept   | CBDAS slope: -3.289; Intercept: 21.482; THCAS slope: -3.928; Intercept: 24.428; CBCAS slope: -3.289; Intercept: 22.266 |
| PCR efficiency calculated from slope         | Shown in Table 3                                                                                                       |
| r2 of standard curve                         | Shown in Table 3                                                                                                       |
| Linear dynamic range                         | Samples were situated within the range of the efficiency curve                                                         |

#### DATA ANALYSIS

|                                                       |                                                                                                                                                                                                                                                                                                                                                                                                                                                                          |
|-------------------------------------------------------|--------------------------------------------------------------------------------------------------------------------------------------------------------------------------------------------------------------------------------------------------------------------------------------------------------------------------------------------------------------------------------------------------------------------------------------------------------------------------|
| qPCR analysis program (source, version)               | Excel                                                                                                                                                                                                                                                                                                                                                                                                                                                                    |
| Cq method determination                               | Automatic threshold determination by RotorGene 6000                                                                                                                                                                                                                                                                                                                                                                                                                      |
| Outlier identification and disposition                | Dissociation curve verificatin                                                                                                                                                                                                                                                                                                                                                                                                                                           |
| Results of NTCs                                       | Dissociation curve verificatin                                                                                                                                                                                                                                                                                                                                                                                                                                           |
| Justification of number and choice of reference genes | Two reference genes were selected, based on evidences illustrated in materials and methods and results.                                                                                                                                                                                                                                                                                                                                                                  |
| Description of normalisation method                   | Raw data for target and reference genes were transformed using the 'Standard Curve Method'; the transcripts level of target genes was normalized to the geometric mean of the transcripts level of CsClathrin and CsRAN and reported as Relative Quantitation (RQ) of transcriptional levels [46] expressed in Arbitrary Units (A.U.). Finally, the standard error of the mean of three biological replicates was calculated and reported in the graphs as bar of error. |
| Number and stage (RT or qPCR) of technical replicates | Two technical replicates                                                                                                                                                                                                                                                                                                                                                                                                                                                 |
| Statistical methods for result significance           | Student't t-test on log transformed values                                                                                                                                                                                                                                                                                                                                                                                                                               |
| Software (source, version)                            | Excel                                                                                                                                                                                                                                                                                                                                                                                                                                                                    |
