# Supplementary material for: Analysis of Sequence Variability and Transcriptional Profile of Cannabinoid synthase Genes in Cannabis sativa L. Chemotypes with a Focus on Cannabichromenic acid synthase
Source: Plants (Basel). 2021 Sep 8;10(9):1857. doi: 10.3390/plants10091857 (PMC8466818; doi:10.3390/plants10091857)
Supplement: Supplementary file 1 [file plants-10-01857-s001.zip › Supplementary Tables.xlsx]

## Sheet: S1
Accession number	Cultivar	Genome representation	Assembly level
GCA_003417725.2	Finola	Full	Chromosome
GCA_000230575.5	Purple Kush	Full	Chromosome
GCA_003660325.2	Jamaican Lion DASH	Full	Contig
GCA_002090435.1	Pineapple Banana Bubba Kush	Full	Contig
GCA_001865755.1	Cannatonic	Full	Contig
GCA_001510005.1	LA Confidential	Full	Contig
GCA_001509995.1	Chemdog91	Full	Scaffold
GCA_900626175.2	cs10/CBDRx	Full	Chromosome

## Sheet: S2
Genotype	No. of CBCAS cds	Accession code	No. of THCAS cds	Accession code	No. of CBDAS cds	Accession code
C.S.	6	MW429517, MW429528, MW429536, MW429537, MW429538, MW429539	0	.	2	MW429549, MW429550,
Carmagnola	5	MW561075, MW429518, MW429519, MW429520, MW429521	0	.	1	MW429550
Carmaleonte	5	MW429515, MW429516, MW429517, MW429551, MW561074	0	.	4	MW429541, MW429542, MW429549, MW429550
Fibrante	5	MW429528, MW429529, MW429530, MW429551, MW561073	0	.	2	MW429548, MW429550
Fibranova	3	MW429518, MW429531, MW429532	0	.	3	MW429550, MW429546, MW429547
Futura 75	4	MW429517, MW429525, MW429526, MW429527	0	.	1	MW429550
Santhica 27	3	MW429551, MW429523, MW429524	0	.	1	MW429549
Eletta Campana	2	MW429534, MW429535	0	.	2	MW429549, MW429550
Codimono	1	MW429540	0	.	1	MW429550
Bernabeo	2	MW429551, MW429522	0	.	1	MW429549
Ermo	2	MW429551, MW429533	0	.	5	MW429549, MW429550, MW429543, MW429544, MW429545
CINBOL	1	MW429551	3	E33090, MW429552, MW429553	0	.
CINRO	1	MW429551	1	E33090	1	MW429550

## Sheet: S3
Accession	13	18	41	45	46	63	71	73	79	111	138	168	198	254	257	287	300	410	437	440	441	600	856	970	1074	1110	1124	1127	1138	1162	1170	1258	1372	1410	1422	1424	1438	1518	1560	1581	1582	1628
AB212830	G	T	T	A	T	C	A	A	A	C	A	C	G	T	C	G	C	C	C	C	G	G	G	C	A	G	C	G	G	G	A	G	C	T	C	A	G	G	G	C	A	A
MW429515	A	C						T																												G						G
MW429516	A	C			A															T																						G
MW429517	A	C																					C																			G
MW429518	A	C																			A						T															G
MW429519	A	C											A									C																				G
MW429520	A	C								T						A														T	T											G
MW429521	A	C		G													T																									G
MW429522	A	C						T																																		G
MW429523	A	C							T															T		T								G						T		G
MW429524	A	C							T															T		T								G								G
MW429525	A	C								T																				T	T											G
MW429526	A	C									T																	A														G
MW429527	A	C		G										C			T																									G
MW429528	A	C																T																								G
MW429529	A	C																																							C	G
MW429530	A	C							T																				A					G								G
MW429531	A	C																	T																			T				G
MW429532	A	C																							C														A			G
MW429533	A	C						T															C																			G
MW429534	A	C														A																										G
MW429535	A	C						T										G														A										G
MW429536	A	C				G																											T		G							G
MW429537	A	C										T			T																											G
MW429538	A	C		G													T																				T					G
MW429539	A	C					G																C																			G
MW429540	A	C	C																															G								G
MW561075	A	C											A																													G
MW561074	A	C							T																									G								G
MW561073	A	C			A																																					G
MW429551	A	C																																								G
AA position	5		14	15	16	21	24	25	27					85	86	96		137	146	147			286			370	375	376	380	388	390	420	458			475	480	506			528	543
Substitution	A		I	I	F	F	Q	I	I					V	T	S		T	T	A			D			L	A	G	A	V	K	G	H			Q	A	W			N	H
	↓		↓	↓	↓	↓	↓	↓	↓					↓	↓	↓		↓	↓	↓			↓			↓	↓	↓	↓	↓	↓	↓	↓			↓	↓	↓			↓	↓
	T		T	M	I	L	R	F	L					A	I	N		M/R	I	V			H			F	V	E	T	F	N	S	Y			R	S	C			H	R

## Sheet: S4
Accession code	105	348	420	681	770	953	958	1036	1426	1559	1621
E55107	G	T	A	T	T	G	G	T	C	T	C
MW429541	T	G
MW429542	T								T	C
MW429543	T			C	C				T
MW429544	T							C	T
MW429545	T					T			T
MW429546	T		T
MW429547	T										G
MW429548	T						A
MW429549	T								T
MW429550	T
AA position					257	318	320	346	476	520	541
Substitution					F	G	V	W	P	V	R
					↓	↓	↓	↓	↓	↓	↓
					S	V	M	R	S	A	G

## Sheet: S5
Genotypes	Ratio CBDAS/CBCAS
Carmagnola	2.14154
CS	4.03075
Fibrante	4.69091
Fibranova	14.0855
Eletta Campana	9.67004
Codimono	5.77303
Futura 75	15.513
Carmaleonte	5.77231
Santhic 27	0.232909
Bernabeo	6.72034
Ermo	18.2907
